# Supplementary material for: Multiscale simulation of surfactant–aquaporin complex formation and water permeability
Source: Royal Society of Chemistry journal article supplement (doi:10.1039/c4ra03759f), 2014-01-01
Supplement: c4ra03759f1.pdf [file c4ra03759f1.pdf]

**Supplementary Material**  
**Multiscale Simulation of Surfactant-Aquaporin Complex Formation  
and Water Permeability**

Xian Kong<sup>1</sup>, Zhixian Li<sup>1</sup>, Diannan Lu<sup>1\*</sup>, Zheng Liu,<sup>\*</sup> and Jianzhong Wu<sup>2\*</sup>

<sup>1</sup> Department of Chemical Engineering, Tsinghua University, Beijing, 100084, China

<sup>2</sup> Department of Chemical & Environmental Engineering, University of California, Riverside,  
CA 92521, U.S.A.

**Table S1.** The number of atoms (N) and the net charge (Z) of each AqpZ monomer at different

pH values

| pH | N    | Z  |
|----|------|----|
| 4  | 2144 | 10 |
| 7  | 2134 | 0  |

**Molecule model for SDS**

Tables S2 to S5 give the force-field parameters for the bonded and non-bonded interactions of SDS molecules, i.e., parameters appeared in the potential function:

$$\begin{aligned}
V(r_1, r_2, r_3, \mathbf{K}, r_N) = & \\
& \left. \begin{aligned}
& \sum_{\text{Bonds}} \frac{1}{4} K_b (b^2 - b_0^2)^2 + \sum_{\text{angles}} \frac{1}{2} K_\theta (\cos(\theta) - \cos(\theta_0))^2 \\
& + \sum_{\substack{\text{Pr oper} \\ \text{dihedral}}} K_\phi (1 + \cos(n\phi - \phi_S))
\end{aligned} \right\} \text{Bonded interactions} \\
& + \left. \begin{aligned}
& \sum_i \sum_{j>i} \left( \frac{C_{ij}^{12}}{r_{ij}^{12}} - \frac{C_{ij}^6}{r_{ij}^6} \right) \\
& + \sum_i \sum_{j>i} \left( \frac{q_i q_j}{4\pi\epsilon_o \epsilon_r r_{ij}} \right)
\end{aligned} \right\} \text{Non - bonded interactions}
\end{aligned}$$

**Table S2.** Covalent bond parameters between atoms of type *i* and type *j* from the SDS molecule.

Here  $b_0$  stands for bond length and  $k_b$  for harmonic vibration constant.

| type <i>i</i> | type <i>j</i> | $b_0$ (nm) | $k_b$ (kJ mol <sup>-1</sup> nm <sup>-2</sup> ) |
|---------------|---------------|------------|------------------------------------------------|
| S             | OM            | 0.150      | 376 650.0                                      |
| S             | OS            | 0.136      | 376 560.0                                      |
| OS            | CH2           | 0.143      | 251 040.0                                      |
| CH2           | CH2           | 0.153      | 334 720.0                                      |

**Table S3.** Angle parameters for SDS. Here  $\theta_0$  is the equilibrium bond angle, and  $k_\theta$  is the bond angle harmonic vibrational constant.

| type $i$ | type $j$ | type $k$ | $f$ | $\theta_0$ (deg) | $k_\theta$ (kJ mol <sup>-1</sup> rad <sup>-2</sup> ) |
|----------|----------|----------|-----|------------------|------------------------------------------------------|
| OM       | S        | OM       | 1   | 109.5            | 520.00                                               |
| OS       | S        | OM       | 1   | 109.5            | 520.00                                               |
| CH2      | OS       | S        | 1   | 120.0            | 397.50                                               |
| CH2      | CH2      | OS       | 1   | 109.5            | 460.24                                               |
| CH2      | CH2      | CH2      | 1   | 111.0            | 460.24                                               |
| CH2      | CH2      | CH3      | 1   | 111.0            | 460.24                                               |

**Table S4.** Parameters for the dihedral angles

| type <i>i</i> | type <i>j</i> | type <i>k</i> | type <i>l</i> | <i>f</i> | $\varphi$ (deg) | $k_{\varphi}$ (kJ mol <sup>-1</sup> )<br>1) | <i>n</i> |
|---------------|---------------|---------------|---------------|----------|-----------------|---------------------------------------------|----------|
| X             | OS            | S             | X             | 1        | 0.0             | 3.766                                       | 3        |
| X             | OS            | CH2           | X             | 1        | 0.0             | 3.766                                       | 3        |
| X             | CH2           | CH2           | X             | 1        | 0.0             | 5.858                                       | 3        |

**Table S5.** Parameters for the atomic partial charges and the Lennard-Jones (LJ) potential.

| atomic type       | $q, e$ | $C^6$        | $C^{12}$     |
|-------------------|--------|--------------|--------------|
| Na <sup>+</sup>   | +1.000 | 7.2063121e-5 | 2.1025000e-8 |
| OM                | -0.654 | 2.2619536e-3 | 7.4149321e-7 |
| S                 | +1.284 | 9.9840064e-3 | 1.3075456e-5 |
| OS                | -0.459 | 2.2619536e-3 | 1.5055290e-6 |
| CH2 (next to OS)  | +0.137 | 7.1048041e-3 | 2.5775929e-5 |
| CH2 (in the tail) | 0.000  | 7.1048041e-3 | 2.5775929e-5 |
| CH3               | 0.000  | 9.9161764e-3 | 3.3570436e-5 |

## Gauche defect probability of SDS adsorbed on AqpZ

The conformation of SDS molecule is characterized by the dihedral angle formed by 4 carbon atoms in the SDS tail. The distribution of the dihedral angle is used to compute the gauche defect probability, namely, the probability of the hydrocarbon tail's having a kink. A hydrocarbon sequence i-j-k-l is defined to have a kink if the dihedral angle formed by the four atoms is between 30 and 150 degrees.

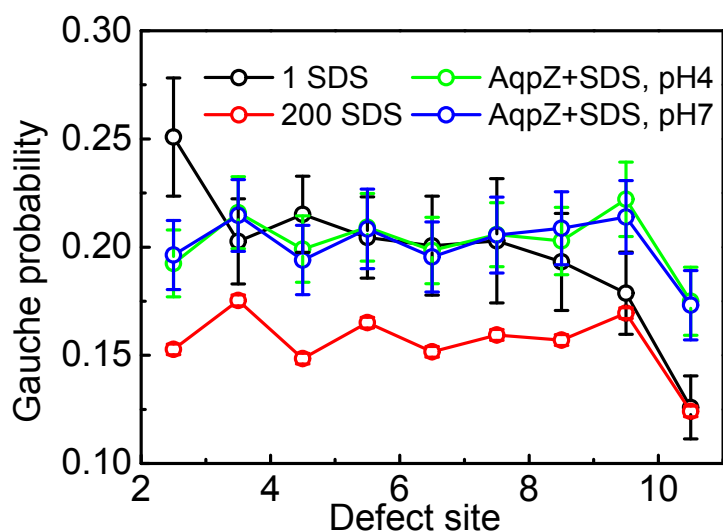

**Figure S1.** Gauche defect probability for hydrocarbon tail in systems of one SDS, 200 SDS molecules, SDS adsorbed on AqpZ at pH 4 and 7. The carbon site numbering starts from the C atom next to the SO<sub>4</sub> head group and is plotted so that, for example, 2.5 refers to the bond between second and third carbon atom in the tail.

We studied the probability of gauche defect for SDS adsorption on AqpZ and the results were given in Figure S1. For SDS molecules adsorbed at the AqpZ surface, the gauche-defect probability is changed mainly at the tail end of SDS molecules. While gauche defect probability at the head end is between that for a single SDS molecule and the average for 200 SDS

molecules. It should be emphasized that the gauche-defect probability for SDS molecules at the AqpZ surface is similar to that of a single SDS molecule and higher than that in a micelle of 200 SDS molecules. As a result, the behavior of SDS at the AqpZ surface is totally different from that in a micelle. This is consistent with the RDF in the main text that the SDS tails are much closer to the AqpZ surface than SDS heads.
